# Supplementary material
Source: publisher figshare collection journal article supplement (https://springernature.figshare.com/ndownloader/files/13837367)
Supplement: Supplementary file 1 [file 13837367]

### **Cereal diseases**

# Fungi and bacteria / fungal- and bacterial diseases

*Old Latin names in parenthesis*

**Latin Latin Swedish English
sexual stage/ asexual stage/
perfekt stage/teleomorf imperfekt stage/anamorf_______________________________**

#### **Hordeum vulgare Korn Barley**

### **Root or straw base diseases**

### *Ophiobolus graminis* *Gaumannomyces graminis* Rotdödare Take-all

*Oculimacula yallundae Helgardia herpotrichoides* Stråknäckare Eyespot *(Tapesia yallundae)* (f.d*. Pseudocercosporella
 herpotrichoides*)

*Ceratobasidium cereale Rhizoctonia cerealis*  Skarp ögonfläck Sharp eyespot

*Thanatephorus cucumeris Rhizoctonia solani* Rotröta Root rot

*Typhula incarnata* Röd trådklubba Gray snow mold
*Typhula ishikariensis* Svart trådklubba Gray snow mold *Monographella nivalis Microdochium nivale* Snömögel Snow mold

**Leaf blotches or mildew***Cochliobolus sativus Bipolaris sorokiniana* Bipolaris rotröta, Seedling blight, common bladfläck root rot, crown rot, spot blotch

*Pyrenophora graminea Drechslera graminea* Strimsjuka Leaf stripe, barley stripe

*Pyrenophora teres Drechslera teres* Bladfläcksjuka Net blotch
 forma *teres*  nättypen net-type
forma *maculata* fläcktypen spot-type

### Unknown *Rhynchosporium commune* Sköldfläcksjuka Scald *(*before *R. secalis)*

Unknown *Ramularia collo-cygni* Ramularia bladfläck Ramularia leaf spot

*Parastagonospora nodorum* Brunfläcksjuka Stagonospora blotch
(f.d. *Phaeosphaeria nodorum* resp. *Stagonospora nodorum*)

*Oidium monolioides Blumeria graminis* Gräsmjöldagg Powdery mildew(f.d. *Erysiphe graminis*)

### **Rust fungi***Puccinia graminis* SvartrostStem rust, black rust *Puccinia hordei* KornrostBrown rust, leaf rust *Puccinia striiformis* *Gulrost* Stripe rust*,* Yellow rust

**Smut fungi** *Ustilago hordei* Hårdsot Covered smut
*Ustilago nuda* Flygsot Loose smut

**Other fungi**Known/unknown species *Fusarium* spp*.* Fusarioser Seedling blight, common root rot, crown rot, foot rot

*Claviceps purpurea* *Spacelia segetum* Mjöldryga Ergot

**_____________________________________________________________________________________**

***Avena sativa*  Havre Oats**

**Leaf blotches or mildew***Pyrenophora avenae Drechslera avenae* Bladfläcksjuka Leaf blotch

*Parastagonospora avenae* Brunfläcksjuka Speckled blotch
(f.d. *Phaeosphaeria avenae* resp*. Stagonospora avenae*)

*Oidium monolioides Blumeria graminis* Gräsmjöldagg Powdery mildew(f.d. *Erysiphe graminis*)

*Pseudomonas syringae* pv*. coronafasciens* Havrebakterios Halo blight

### **Rust fungi***Puccinia coronata* KronrostCrown rust

*Puccinia graminis* Svartrost Stem rust

**Smut fungi***Ustilago avenae* Flygsot Loose smut

**Other**Känt/okänt beror på art*- Fusarium* spp. Fusarioser Root rot, foot rot, head
 blight

*Claviceps purpurea Spacelia segetum* Mjöldryga Ergot

#### **Triticum aestivum Vete Wheat**

### ***Fungi on roots and straw bases*** *Ophiobolus graminis* *Gaumannomyces graminis* Rotdödare Take-all

*Oculimacula yallundae Helgardia herpotrichoides* Stråknäckare Eyespot
*(Tapesia yallundae) (Pseudocercosporella
 herpotrichoides)*

*Hymenula cerealis* Gulstrimsjuka Cephalosporium stripe (*Cephalosporium gramineum*)

*Ceratobasidium cereale Rhizoctonia cerealis* Skarp ögonfläck Sharp eyespot
*Thanatephorus cucumeris Rhizoctonia solani* Rotröta Root rot

known/unknown *Fusarium* spp. Fusarioser Seedling blight, common root rot, crown rot, foot rot, head blight, scab

*Monographella nivalis Microdochium nivale* Snömögel Snow mold, scab, head blight
*Typhula incarnata* Röd trådklubba Gray snow mold
*Typhula ishikariensis* Svart trådklubba Gray snow mold

**Leaf blotches or mildew***Pyrenophora tritici-repentis Drechslera tritici-repentis* Vetets bladfläck- Tan spot, yellow leaf sjuka spot

*Zymoseptoria tritici* Svartpricksjuka Leaf blotch, Septoria leaf(f.d.*Mycosphaerella graminicola* resp*. Septoria tritici* ) blotch

*Parastagonospora nodorum*  Brunfläcksjuka Stagonospora leaf blotch,
(f.d. *Phaeosphaeria nodorum* resp. *Stagonospora nodorum*) leaf and glume blotch

*Parastagonospora avenae* f.sp. *tritici* BrunfläcksjukaStagonospora leaf blotch(f.d. *Phaeosphaeria avenaria* f.sp. *tritici* resp. *Stagonospora avenae* f.sp*. triticea*)

*- - Ascochyta tritici* no name (svag patogen) Ascochyta leaf spot

*Oidium monolioides Blumeria graminis* Gräsmjöldagg Powdery mildew(f.d. *Erysiphe graminis*)

### ***Rust fungi*** *Puccinia graminis* Svartrost Stem rust, black rust

*Puccinia triticina* (*P. recondita*) Brunrost Leaf rust, brown rust

*Puccinia striiformis* Gulrost Stripe rust, yellow rust

**Smuts** *Tilletia contraversa* Dvärgstinksot Dwarf bunt

*Tilletia tritici* (*T. caries*), Stinksot Bunt, common bunt
*T. laevis*

*Ustilago tritici* Flygsot Loose smut

**Other fungi***Claviceps purpurea* Mjöldryga Ergot

Known / unknown *Alternaria* spp*.,* Sotdagg Sooty molds *Epicoccum* spp., (saprophytes)
 *Cladosporium* spp. m fl

**Virus and virus diseases in cereals and grasses**

**Swedish English**Rödsotvirus (BYDV) Rödsot i havre, Barley yellow dwarf
 Gulsot i korn Barley yellow dwarf
Dvärgskottsjukevirus (OSDV) Dvärgskottsjuka Oat sterile dwarf
Vetedvärgsjukevirus (WDV) Vetedvärgsjuka Wheat dwarf
Bestockningssjukevirus (CTV) Bestockningssjuka Cereal tillering

**Nematodes in cereals and grasses
Root**

*Heterodera avenae* Havrecystnematod Cereal (oat) cyst nematode
*Heterodera hordecalis
Pratylenchus* spp. Rotsårnematod Root lesion nematode
*Subanguina radicicola* Kroknematod Root gall nematode

**Straw, leaf**
*Anguina tritici* Vetefrögallnematod Seed gall nematode
*Anguina* spp. Frögallnematod Seed gall nematode
*Ditylenchus dipsaci* Stjälknematod Stem nematode

### **Diseases in potato**

**Fungi and fungal diseases**

## **Latin Swedish English**

**Above soil:**

*Alternaria alternata, A. solani* Torrfläcksjuka Early blight

*Phytophthora infestans* Potatisbladmögel Late blight

*Rhizoctonia solani* Filtsjuka Stem canker
(perf.: *Thanatephorus cucumeris*)

*Rhizoctonia solani* Groddbränna Damping-off
(perf.: *Thanatephorus cucumeris*)

*Sclerotinia sclerotiorum* Bomullsmögel White mold

**Rots in tubers:**

*Fusarium* spp. Fusariumröta Dry rot

*Phoma foveata* Phomaröta Gangrene

*Phytophthora erythroseptica* Rödröta Pink rot

*Phytophthora infestans* Brunröta Late blight, tuber blight

*Pythium* spp., *P. ultimum* Pythiumröta Leak

*Synchytrium endobioticum* Potatiskräfta Wart

**Scurf:***Helminthosporium solani* Silverskorv Silver scurf

*Polyscytalum pustulans* Blåsskorv Skin spot

*Rhizoctonia solani* Lackskorv Black scurf

*Spongospora subterranea* Pulverskorv Powdery scab

## **Bacteria and bacterial diseases**

**Scurf:***Streptomyces scabies* Vanlig skorv Common scab

*Streptomyces* spp. Nätskorv Russet scab

**Rots in tubers and stalks:***Pectobacterium carotovorum* subsp. *atrosepticum* Stjälkbakterios Black leg

(f.d*. Erwinia carotovora* subsp. *atroseptica*)

*Dickeya* spp., *Dickeya solani*

*Pectobacterium carotovorum* subsp. *carotovorum* Blötröta Soft rot
(f.d*. Erwinia carotovora* subsp. *carotovora*)

*Clavibacter michiganensis* subsp. *sepedonicus* Ljus ringröta Bacterial ring rot
*Ralstonia solanacearum* Mörk ringröta Bacterial wilt, brown rot

**Virus and virus diseases in potato**

**Virus Swedish English**

Potatisvirus Y (PVY) Krussjuka Rugose mosaic

Potatisvirus A (PVA) Mosaik, krusmosaik Mottle, mosaic

Potatisbladrullvirus (PLRV) Bladrullsjuka Potato leafroll

Potatisvirus S (PVS) Mild mosaik Potato virus S

Potatisvirus M (PVM) Mild mosaik Paracrinkle

Potatisvirus X (PVX) Mild mosaik, ofta latent Potato virus X

Tobaksrattelvirus Rostringar Spraing, stem mottle
(Tobacco rattle virus, TRV)

Moptopvirus (Potato Rostringar, mopptopp Spraing, mop-top
mop top virus, PMTV)

**Nematodes in potato**

## **Latin Swedish English**

**On roots and tubers:**

*Ditylenchus destructor* Potatisrötnematod Potato rot nematode

*Globodera pallida* Vit potatiscystnematod White potato cyst nematode

*Globodera rostochiensis* Gul potatiscystnematod Yellow potato cyst nematode

*Meloidogyne hapla* Rotgallnematod Northern root-knot nematode

*Pratylenchus* spp. Rotsårnematod Root lesion nematode

*Paratrichodorus* spp. Stubbrotnematod Stubby-root nematode

*Trichodorus* spp. Stubbrotnematod Stubby-root nematode

**Diseases in sugar beet**

**Latin Swedish English**

**Fungi / diseases on leaves**

*Alternaria alternata* Bladfläckar Leaf spot/Leaf blight

*Cercospora beticola* Bladfläckar Leaf spot

*Erysiphe polygoni* Mjöldagg Powdery mildew

*Peronospora farinosa* Betbladmögel Downy mildew

*Phoma betae* Bladfläckar Leaf spot

*Ramularia beticola* Bladfläckar Leaf spot

*Uromyces betae* Betrost Rust

**Fungi / diseases on roots**

*Aphanomyces cochlioides* | Rotbrand, | Damping off, Root rot,

*Phoma betae* | Groddbrand | Black root, Black leg,

*Pythium* spp. | | Seedling blight

*Rhizoctonia solani* | |

*Rhizoctonia crocorum* Rotfiltsjuka Violet root rot

**Bacteria and bacterial diseases in sugar beet***Agrobacterium tumefasciens* Bakteriekräfta Crown gall

*Streptomyces scabies* Skorv Scab

**Nematodes in sugar beet***Heterodera schachtii* Betcystnematod Beet cyst neamtode

*Heterodera trifolii* "Gul betcystnematod" "Yellow beet cyst nematode"

*Longidorus* spp. Nålnematod Needle nematode

*Paratrichodorus* spp. Stubbrotnematod Stubby root nematode

*Trichodorus* spp. Stubbrotnematod Stubby root nematode

**Virus and virus diseases in sugar beet**
Betgulsotvirus (BYV) Betgulsot Beet yellows

Betmosaikvirus (BMV) Betmosaik Beet mosaic

Mild betgulsotvirus (BMYV) Mild gulsot Beet mild yellows
(Beet western yellows virus, Beet mild yellowing virus)

Rhizomaniavirus (BNYVV) Rhizomania Rhizomania, Beet necrotic
 yellow vein virus

# Diseases in rape seed

**Fungi and bacteria / Fungal- and bacterial diseases**

**Latin** *(old name in parenthesis)* **Swedish English**

*Albugo candida* Vitrost White rust, staghead

*Alternaria brassicae, A. brassicicola* Svartfläcksjuka Dark pod spot, black spot

*Botrytis cinerea* Gråmögel Grey mold, stem rot

*Cylindrosporium concentricum*

(Perf*. Pyrenopeziza brassicae*) Ljus bladfläck Light leaf spot

*Erysiphe cruciferarum, E. polygoni* Mjöldagg Powdery mildew

*Mycosphaerella brassicicola* Ringfläck Ring spot

*Hyaloperonospora brassicae*(f.d. *Peronospora parasitica*)Kålbladmögel Downy mildew

*Phoma lingam*(perf. *Leptosphaeria maculans
L. biglobosa)*)Torröta Black leg, stem canker

*Plasmodiophora brassicae* Klumprotsjuka Clubroot

*Rhizoctonia solani* Groddbränna Damping-off, brown girdling
 root rot, head rot, root rot,
 seed rot

*Sclerotinia sclerotiorum* Bomullsmögel Stem rot

*Verticillium longisporum*(f.d. *V. dahliae*) Kransmögel Verticillium wilt

*Xanthomonas campestris* pv. *campestris* BrunbakteriosBlack rot

**Nematodes**

**Latin Swedish English**

*Heterodera schachtii* Betcystnematod Beet cyst nematode

**Virus**

Beet Western Yellows Virus (BWYV)
